# Supplementary material for: British Thoracic Society guidelines for home oxygen use in adults: accredited by NICE
Source: HighWire-hosted journal article supplement (doi:10.1136/thoraxjnl-2015-206865), 2015-04-13
Supplement: thoraxjnl-2015-206865supp_appendix10.pdf [file thoraxjnl-2015-206865supp_appendix10.pdf]

## **BTS home oxygen 2012 search**

Sources to be searched;

Cochrane Database of Systematic Reviews (CDSR)

Database of Abstracts of Reviews of Effects (DARE)

Cochrane Central Register of Controlled Trials (CENTRAL)

Health Technology Assessment Database (HTA)

NHS Economic Evaluations Database (NHSEED)

MEDLINE and MEDLINE In-Process

EMBASE

Date range searched: all dates

Trials only in MEDLINE and EMBASE (with study added as additional search term as agreed)

English language only

Human studies only

### **Cochrane Library (includes CDSR, DARE, CENTRAL, HTA and NHSEED)**

<http://www.thecochranelibrary.com>

Searched online 18/07/12

Strategy saved as: bts home oxygen july 2012

- #1 MeSH descriptor Oxygen Inhalation Therapy, this term only 758
- #2 MeSH descriptor Ambulatory Care explode all trees 3204
- #3 MeSH descriptor Long-Term Care explode all trees 953
- #4 MeSH descriptor Night Care explode all trees 38
- #5 MeSH descriptor Palliative Care explode all trees 1221
- #6 MeSH descriptor Sleep explode all trees 3672
- #7 MeSH descriptor Home Care Services explode all trees 1912
- #8 MeSH descriptor Headache Disorders explode all trees 1859
- #9 (#2 OR #3 OR #4 OR #5 OR #6 OR #7 OR #8) 12561
- #10 (#1 AND #9) 93
- #11 ((oxygen or O2) NEAR/2 (home or domestic or household or domiciliary or (short NEXT term) or (long NEXT term) or ambulatory or portable or palliative or night\* or overnight or nocturnal)):ti,ab 388
- #12 (SBOT or LTOT):ti,ab 46
- #13 ((oxygen or o2) NEXT alert card\*):ti,ab 0
- #14 (#10 OR #11 OR #12 OR #13) 424

Of 424 total results in Cochrane Library 18 were from CDSR, 5 from DARE, 379 from CENTRAL, 12 from HTA and 8 from NHSEED. Results saved to Endnote library marked 'Cochrane CDSR 18/07/12', 'Cochrane DARE 18/07/12', 'Cochrane CENTRAL 18/07/12', 'Cochrane HTA 18/07/12' and 'Cochrane NHSEED 18/07/12' in Custom 4 field.

### **MEDLINE and MEDLINE In-Process**

Searched 18/07/12 via OVID interface

Strategy saved as: bts home oxygen medline final

Database: Ovid MEDLINE(R) In-Process & Other Non-Indexed Citations and Ovid MEDLINE(R) <1946 to Present>

- 1 \*Oxygen Inhalation Therapy/ and (exp ambulatory care/ or exp long-term care/ or exp night care/ or exp palliative care/ or exp sleep/ or sleep.hw. or exp home care services/ or exp headache disorders/) (993)
- 2 ((oxygen or O2) adj2 (home or domestic or household or domiciliary or (short adj term) or (long adj term) or ambulatory or portable or palliative or night\$ or overnight or nocturnal)).ti,ab. (2591)
- 3 (SBOT or LTOT).ti,ab. (311)
- 4 ((oxygen or o2) adj alert card\$).ti,ab. (1)
- 5 1 or 2 or 3 or 4 (2902)
- 6 randomized controlled trial.pt. (332056)
- 7 controlled clinical trial.pt. (84622)
- 8 randomized.ab. (247471)
- 9 placebo.ab. (137765)
- 10 clinical trials as topic.sh. (161223)
- 11 randomly.ab. (181392)
- 12 trial.ti. (106531)
- 13 study.ti,ab. (4142219)
- 14 6 or 7 or 8 or 9 or 10 or 11 or 12 or 13 (4537563)
- 15 5 and 14 (1102)
- 16 limit 15 to (english language and humans) (868)

868 total results saved to Endnote library marked 'MEDLINE & MEDLINE In-Process 18/07/12' in Custom 4 field.

## EMBASE

Searched 18/07/12 via OVID interface

Strategy saved as: bts home oxygen embase final

EMBASE 1974 to 2012 Week 28

- 1 \*home oxygen therapy/ or ((\*oxygen therapy/ or \*oxygen/) and (exp home care/ or exp long term care/ or exp ambulatory care/ or exp palliative therapy/ or exp sleep/ or exp headache/)) (1756)
- 2 ((oxygen or O2) adj2 (home or domestic or household or domiciliary or (short adj term) or (long adj term) or ambulatory or portable or palliative or night\$ or overnight or nocturnal)).ti,ab. (3355)
- 3 (SBOT or LTOT).ti,ab. (389)
- 4 ((oxygen or o2) adj alert card\$).ti,ab. (3)
- 5 1 or 2 or 3 or 4 (4337)
- 6 random\$.ti,ab. (750289)
- 7 placebo\$.mp. (294298)
- 8 double-blind\$.ti,ab. (135372)
- 9 study.ti,ab. (5082048)
- 10 6 or 7 or 8 or 9 (5538174)
- 11 5 and 10 (1644)
- 12 limit 11 to (human and english language) (1211)

1211 total results saved to Endnote library marked 'EMBASE 18/07/12' in Custom 4 field.

### Total Results

| Database                                       | Results     | After deduplication | Custom 4 field                        |
|------------------------------------------------|-------------|---------------------|---------------------------------------|
| Cochrane Database of Systematic Reviews        | 18          | 18                  | Cochrane CDSR 18/07/12                |
| Database of Abstracts of Reviews of Effects    | 5           | 5                   | Cochrane DARE 18/07/12                |
| Cochrane Central Register of Controlled Trials | 379         | 364                 | Cochrane CENTRAL 18/07/12             |
| Health Technology Assessment Database          | 12          | 11                  | Cochrane HTA 18/07/12                 |
| NHS Economic Evaluations Database              | 8           | 4                   | Cochrane NHSEED 18/07/12              |
| MEDLINE and MEDLINE In-Process                 | 868         | 620                 | MEDLINE & MEDLINE In-Process 18/07/12 |
| EMBASE                                         | 1211        | 370                 | EMBASE 18/07/12                       |
| <b>Total</b>                                   | <b>2501</b> | <b>1392</b>         |                                       |

All results saved to Endnote X3 library 'BTS home oxygen adults 2012.enl'

### Total Results: January 2014

| Database                                       | Results | After deduplication against the 2012 database | Custom 4 field                   |
|------------------------------------------------|---------|-----------------------------------------------|----------------------------------|
| Cochrane Database of Systematic Reviews        | 18      | 2                                             | Cochrane CDSR 07/01/14           |
| Database of Abstracts of Reviews of Effects    | 5       | 1                                             | Cochrane DARE 07/01/14           |
| Cochrane Central Register of Controlled Trials | 415     | 27                                            | Cochrane CENTRAL 07/01/14        |
| Health Technology Assessment Database          | 13      | 1                                             | Cochrane HTA 07/01/14            |
| NHS Economic Evaluations Database              | 9       | 0                                             | Cochrane NHSEED 07/01/14         |
| Cochrane Method Studies Register               | 2       | 1                                             | Cochrane Method Studies 07/01/14 |

|                                   |             |            |                                             |
|-----------------------------------|-------------|------------|---------------------------------------------|
| MEDLINE and<br>MEDLINE In-Process | 1093        | 75         | MEDLINE &<br>MEDLINE In-Process<br>07/01/14 |
| EMBASE                            | 1489        | 219        | EMBASE 07/01/14                             |
| <b>Total</b>                      | <b>3044</b> | <b>326</b> |                                             |
