# Supplementary material for: British Thoracic Society guidelines for home oxygen use in adults: accredited by NICE
Source: HighWire-hosted journal article supplement (doi:10.1136/thoraxjnl-2015-206865), 2015-04-13
Supplement: thoraxjnl-2015-206865supp_appendix12.pdf [file thoraxjnl-2015-206865supp_appendix12.pdf]

## Web Appendix 12: Home Oxygen Equipment

This appendix contains examples images of oxygen equipment to aid the readers understanding of what devices may look like and/or how they work. Readers need to be aware that the devices available and appearance in this section does not recommend, condone or approve any particular brand over similar devices. Users of the guidelines are recommended to contact their local home oxygen assessment services or oxygen providers for updated information about equipment locally available. Under the terms of the National Framework Agreement, home oxygen providers will select equipment type best suited to the patients' needs: however, not all providers will provide all the devices.

| CYLINDERS         | These are examples only and size & weight will vary with the different manufacturers equipment | SIZE                                    | WEIGHT                          | Capacity    |
|-------------------|------------------------------------------------------------------------------------------------|-----------------------------------------|---------------------------------|-------------|
| STATIC<br>I.E B10 |              | 71cm (28 ins) ht: 18.2 cm (7.1ins) diam | Full 15kg – 18 Kg (33lb – 39lb) | 2122 litres |

|                                                  |                                                                                     |                                                                         |                                         |                   |
|--------------------------------------------------|-------------------------------------------------------------------------------------|-------------------------------------------------------------------------|-----------------------------------------|-------------------|
| <p><b>PORTABLE</b><br/>i.e.Freedom 400 or B2</p> |    | <p>53 cm (20.8 ins) ht:<br/>10cm (3.9 ins) diam</p>                     | <p>Full 3.2 Kg – 3.7 Kg (7lb – 8lb)</p> | <p>430 litres</p> |
| <p>i.e.Freedom 300 or B1</p>                     |                                                                                     | <p>43 cm (16.9 ins) ht: 8.5 cm (3.3 ins)</p>                            | <p>Full 2.1Kg 2.6Kg (4.6lb – 5.7lb)</p> | <p>308 litres</p> |
| <p>Conservor devices for cylinders</p>           |   |                                                                         |                                         |                   |
| <p><b>CONCENTRATORS</b><br/>Standard</p>         |  | <p>68 cm (26.7 in) ht: 38 cm (14.9 ins) width: 28 cm (11 in) depth.</p> | <p>24.5 Kg (54 lb)</p>                  | <p>N/A</p>        |
| <p>Lightweight/smaller</p>                       |                                                                                     | <p>57 cm (22.4) ht: 34 cm (13.3 ins) width: 28cm (11in) depth.</p>      | <p>13Kg (28.6 lb)</p>                   | <p>N/A</p>        |

|                      |                                                                                     |                                                                                                                                        |                                                        |            |
|----------------------|-------------------------------------------------------------------------------------|----------------------------------------------------------------------------------------------------------------------------------------|--------------------------------------------------------|------------|
| <p>Transportable</p> |   | <p>49 cm (19.3 in) ht: 31.2 cm (12.3 in) width: 18cm (7 in) depth.</p>                                                                 | <p>8.1Kg (17.8 lb)</p>                                 | <p>N/A</p> |
| <p>Portable</p>      |  | <p>31.5 – 24.1 cm ( 12.4 – 9.5 in ht: 15.2 – 9.9 cm (6 – 3.9 in) width: 29.5 – 27.2 cm (11.6 – 10.7 ins) depth. Depending on model</p> | <p>4.4 – 3.3 Kg (9.7 – 7.25 lb) depending on model</p> | <p>N/A</p> |

|                                                                                  |                                                                                                                                                                        |  |                                                           |                                                                                                                       |                                                            |
|----------------------------------------------------------------------------------|------------------------------------------------------------------------------------------------------------------------------------------------------------------------|--|-----------------------------------------------------------|-----------------------------------------------------------------------------------------------------------------------|------------------------------------------------------------|
| <p>Homefill</p>                                                                  |                                                                                       |  | <p>38 cm ht:<br/>51.5 cms<br/>width: 40<br/>cm depth.</p> | <p>Concentrator<br/>20.5 Kg<br/>Homefill<br/>compressor 15<br/>Kg<br/>Cylinder weight<br/>1.66 – 2.1 Kg<br/>empty</p> | <p>Homefill<br/>cylinders<br/>157 –<br/>240<br/>litres</p> |
| <p><b>Liquid Oxygen</b><br/>Large LOX Dewar and<br/>refillable portable unit</p> |   |  |                                                           |                                                                                                                       |                                                            |

|                                                                                                 |                                                                                   |  |                                                     |                          |                          |
|-------------------------------------------------------------------------------------------------|-----------------------------------------------------------------------------------|--|-----------------------------------------------------|--------------------------|--------------------------|
| <p>Portable LOX unites<br/> <b>Picture above under B10 cylinder</b></p>                         |  |  | <p>38 cm ht:</p>                                    | <p>Full 2.5 – 3.9 Kg</p> | <p>516 – 1058 litres</p> |
| <p><b>Supplementary equipment</b><br/> Backpack<br/> <b>This is a portable concentrator</b></p> |                                                                                   |  | <p>Fits both standard and lightweight cylinders</p> |                          |                          |

|                             |                                                                                     |                                                     |  |  |
|-----------------------------|-------------------------------------------------------------------------------------|-----------------------------------------------------|--|--|
| <p>Trolley/Wheeled Cart</p> |  | <p>Fits both standard and lightweight cylinders</p> |  |  |
|-----------------------------|-------------------------------------------------------------------------------------|-----------------------------------------------------|--|--|

| Oxygen Delivery Devices   |                                                                                     | Concentration                                    | Flow                                                                                             |
|---------------------------|-------------------------------------------------------------------------------------|--------------------------------------------------|--------------------------------------------------------------------------------------------------|
| Non-rebreathing mask      |    | 60% - 80% (variable)                             | 10 – 15 L/min                                                                                    |
| Medium Concentration Mask |    | 35% - 60% (variable)                             | 5 – 10 L/min                                                                                     |
| Venturi mask              |   | 24% - 60% depending on venturi used (accurate %) | Depends on venturi used: flow stated on barrel                                                   |
| Nasal Cannulae            |  | 24% - 60% (variable)                             | 1 L/min – 15L/min depending on nasal cannulae used<br>1 – 4 L/min<br>4 – 8 L/min<br>8 – 15 L/min |

Acknowledgement: BTS is grateful to BOC Healthcare and BAREMA for assistance with a number of the images in this appendix. These examples are illustrative and may vary with each provider.
